# Supplementary material for: A genomic basis of vocal rhythm in birds
Source: PubMed Central journal article supplement (PMC11039653; doi:10.1038/s41467-024-47305-5), 2024-04-23
Supplement: 41467_2024_47305_MOESM3_ESM.pdf [file 41467_2024_47305_MOESM3_ESM.pdf]

## Description of Additional Supplementary Files

### Supplementary Movie 1

Description: Pusillus\_23Nov21.mp4 is a ~ 7 sec video clip of a redfronted tinkerbird (*Pogoniulus pusillus pusillus*) recorded singing on 23rd Nov 2021 by A. Kirschel using a Canon R5 camera near KwaBulawayo, KwaZulu-Natal Province, South Africa.

### Supplementary Movie 2

Description: Hybrid\_tinkerbird\_24Nov18.mp4 is a ~ 11 sec video clip of an admixed individual (this individual was subsequently banded, sampled and recorded again), recorded singing on 24th Nov 2018 by A. Kirschel using a Canon 1D Mark IV DSLR camera, near Tshaneni, Eswatini, in the contact zone of the two species.

### Supplementary Movie 3

Description: extoni\_14Nov21.mp4 is a ~ 8 sec video clip of a yellowfronted tinkerbird (*Pogoniulus chrysoconus extoni*) recorded singing on 14th Nov 2021 by A. Kirschel using a Canon R5 camera in De Tweedespruit Conservancy, Gauteng Province, South Africa.

### Supplementary Data 1

Description: List of whole-genome samples used in this study. The species is assigned only for allopatric individuals, whereas we provide the proportion of *pusillus* ancestry (0 = pure *extoni* and 1 = pure *pusillus* for sympatric individuals).

### Supplementary Data 2

Description: List of individuals sequenced using ddRAD. The species is assigned only for allopatric individuals and provides the proportion of *pusillus* ancestry from fastSTRUCTURE for all individuals.
